# Supplementary material for: Persistence of a self-complementary N–H⋯N tape motif in chloro-s-triazine crystals: crystal structures of simazine and atrazine herbicides and their polymorphic and inclusion behaviour
Source: Royal Society of Chemistry journal article supplement (doi:10.1039/c5ce02206a), 2016-01-01
Supplement: c5ce02206a1.pdf [file c5ce02206a1.pdf]

**Supporting Data for *Persistence of the self-complementary N-H...N tape motif in chloro-s-triazine crystals; crystal structures of the simazine and atrazine herbicides, their polymorphic and inclusion behaviour.***

**Contents:**

Three figures are presented the interactions occurring between self-complementary hydrogen-bonded tapes (S1-S3) and to visualise the isostructural character of **2<sub>Form\_II</sub>** and **3** (S4).

Figure S1. Inter-tape packing of (a) **1**, and (b) **2<sub>Form\_I</sub>** showing side chain interactions.

Figure S2. Inter-tape packing of (a) **2<sub>Form\_II</sub>** and (b) **2.TCE** showing side chain interactions.

Figure S3: Packing of N-H...N tapes in (a) **1<sub>Form\_I</sub>**, and (b) **2<sub>Form\_I</sub>**. showing aromatic C...C interactions.

Figure S4: Packing in (a) **2<sub>Form\_II</sub>** and (b) **3** indicating how these two structures are isostructural, despite the differences in space group.

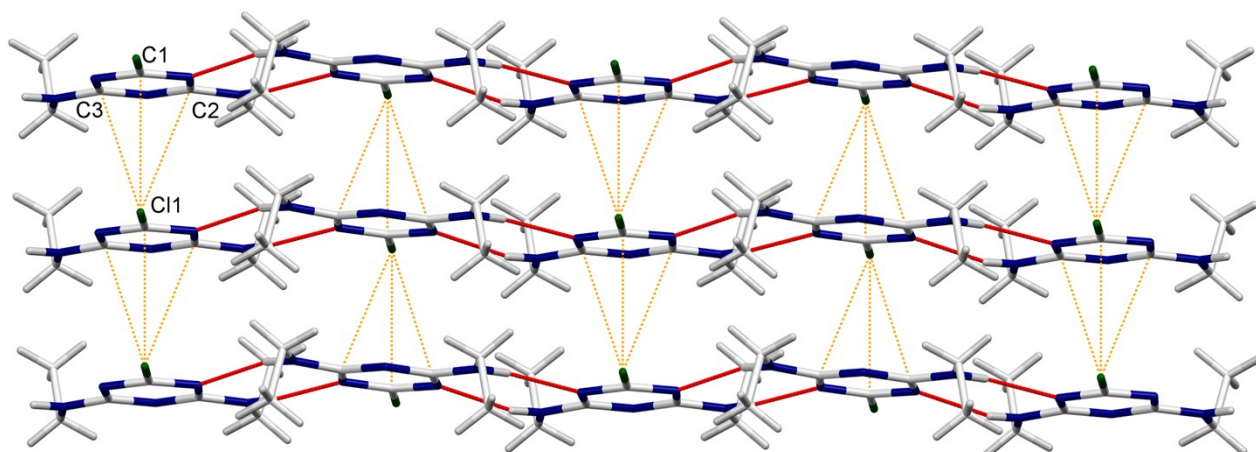

(a)

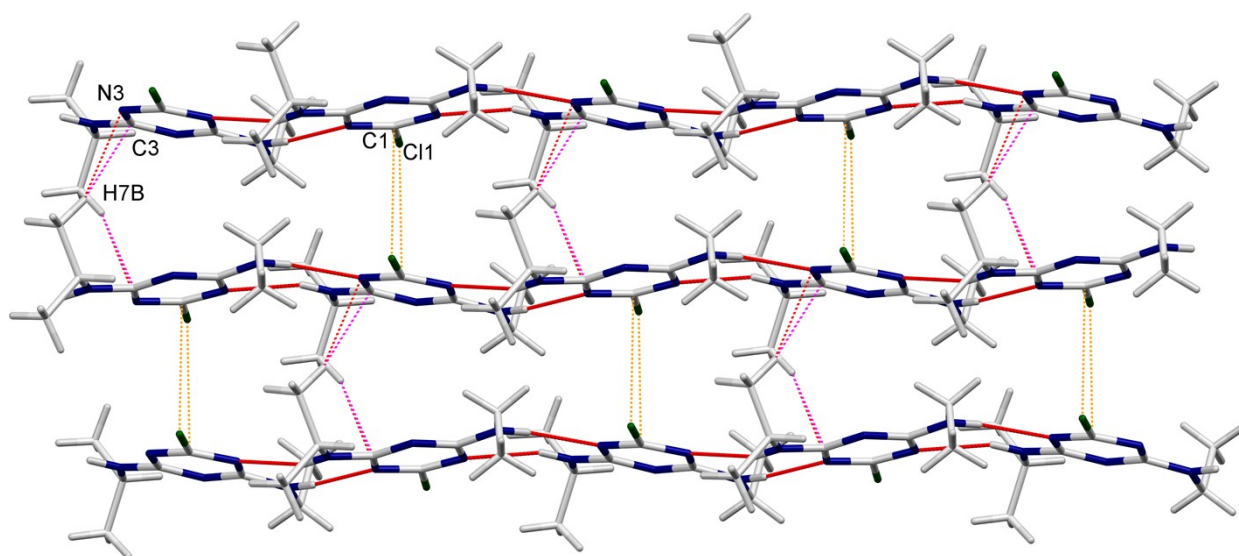

(b)

Figure S1. Inter-tape packing of (a) **1**, and (b) **2<sub>Form\_1</sub>** showing side chain interactions. Interactions between the tapes are indicated as follows: N-H...N contacts are depicted in red, H...Cl contacts in black, Cl... $\pi$  in orange, C-H... $\pi$  in magenta, C...C in green N...Cl in light blue and C...N in purple.

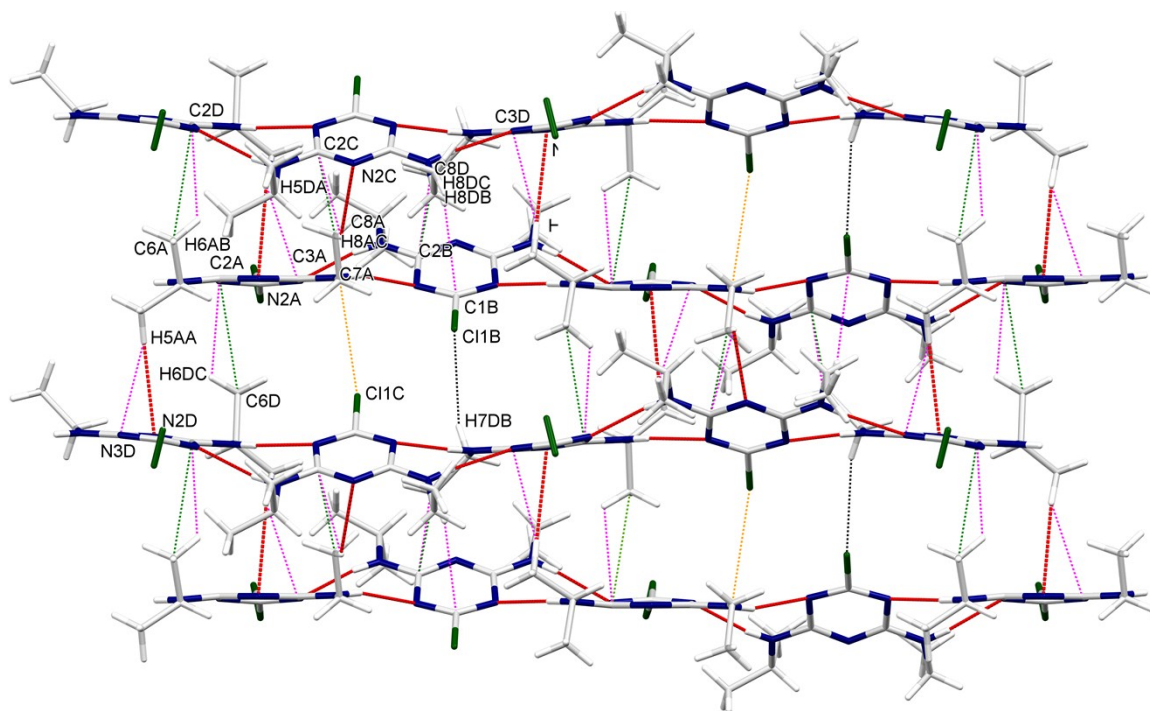

(a)

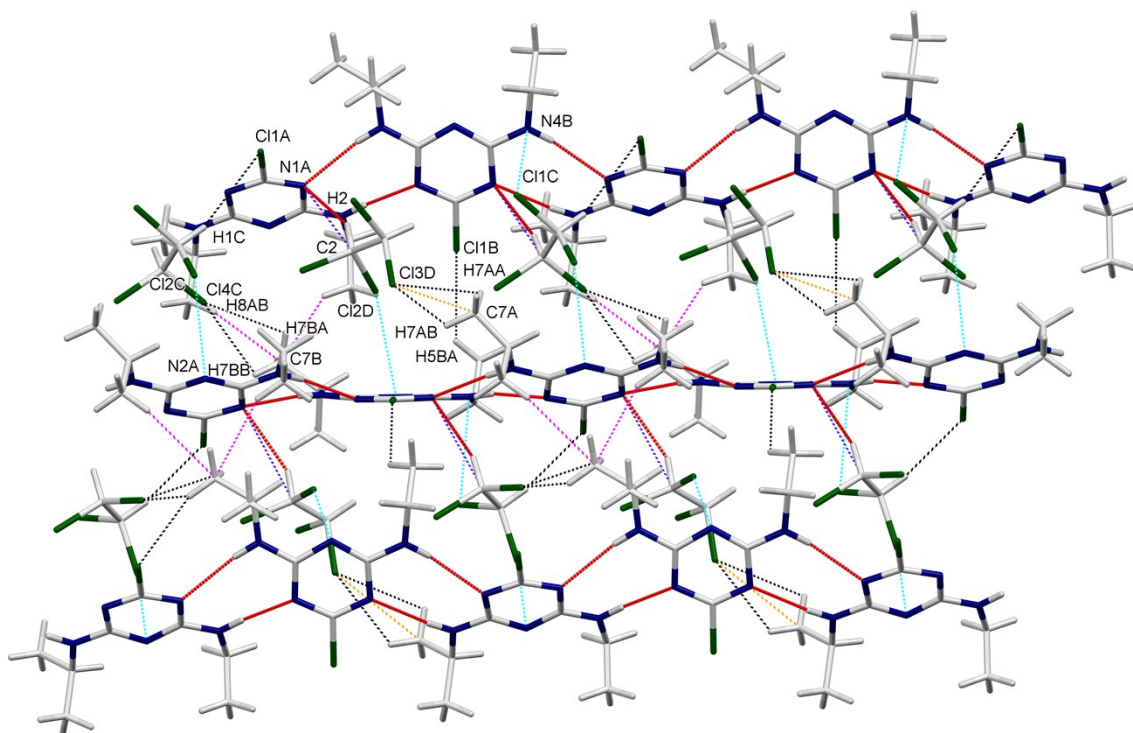

(b)

Figure S2. Inter-tape packing of (a) **2<sub>Form\_II</sub>** and (b) **2.TCE** showing side chain interactions. Interactions between the tapes are indicated as follows: N-H...N contacts are depicted in red, H...Cl contacts in black, Cl... $\pi$  in orange, C-H... $\pi$  in magenta, C...C in green N...Cl in light blue and C...N in purple.

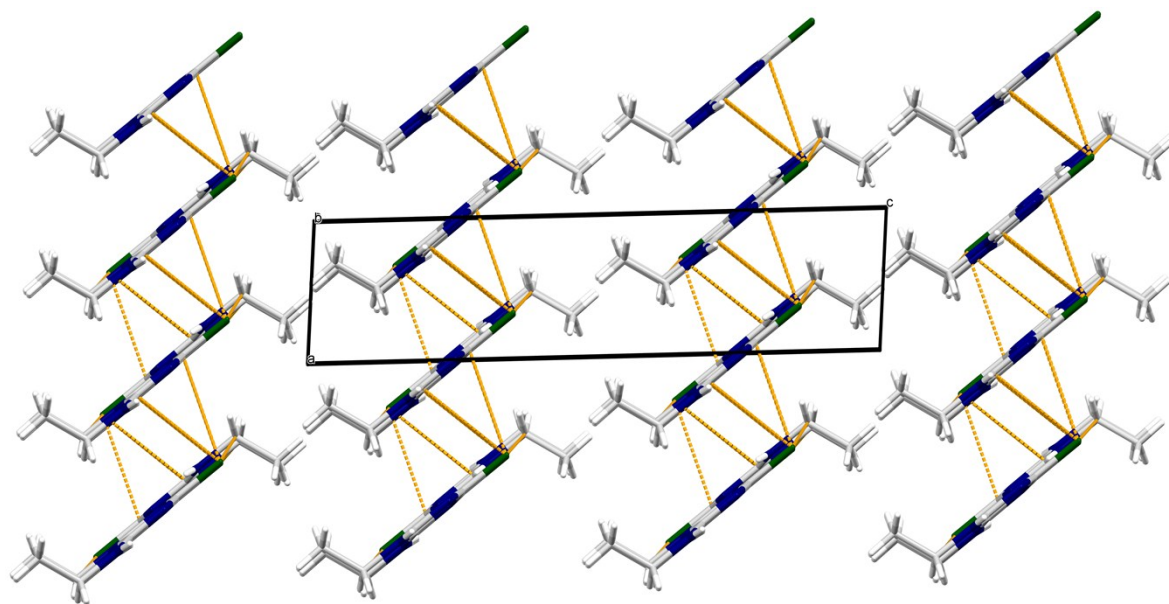

(a)

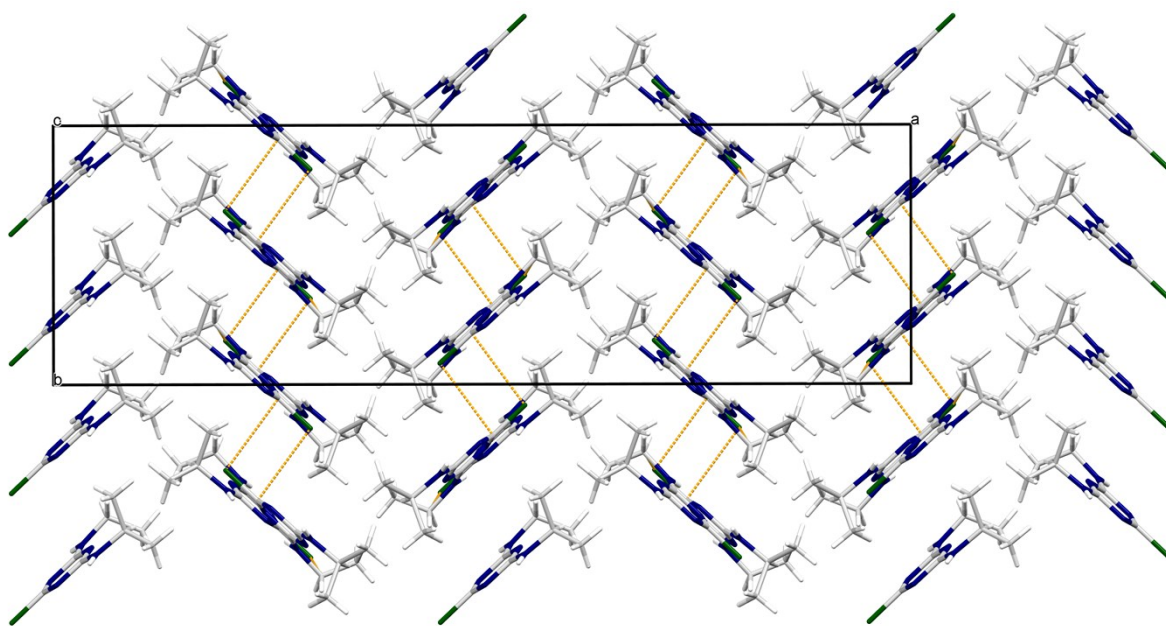

(b)

Figure S3: Packing of N-H...N tapes in (a)  $1_{\text{Form}_I}$ , and (b)  $2_{\text{Form}_I}$ . showing aromatic C...C interactions. Interactions are indicated by broken yellow lines.



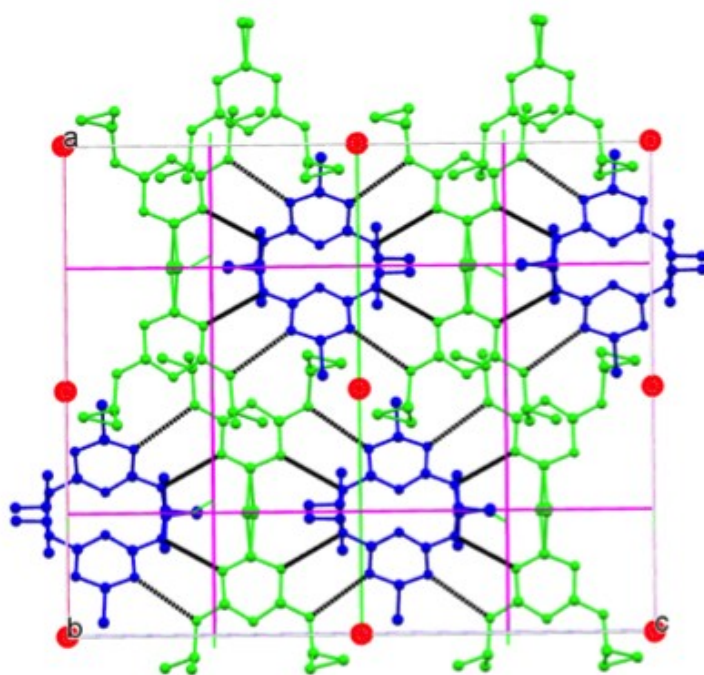

(a)

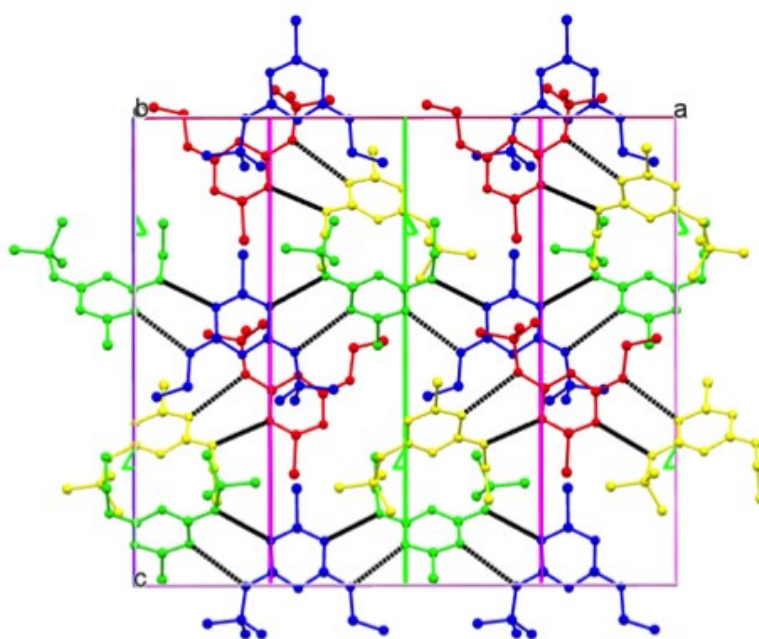

(b)

Figure S4: Packing in (a)  $\mathbf{2}_{\text{Form\_II}}$  and (b)  $\mathbf{3}$  indicating how these two structures are isostructural, despite the differences in space group.
